# Supplementary material
Source: publisher figshare collection journal article supplement (https://tandf.figshare.com/ndownloader/files/21725403)
Supplement: Supplementary file 1 [file 21725403]

**Figure S1** Average outer wall temperatures of two tubes in sand/graphite blend.
